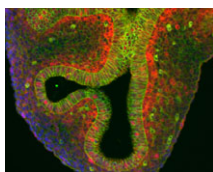

### FGF10 function in the lung branches off

Lung development in mice involves specification of the primary lung field followed by the formation of lung buds, which subsequently undergo outgrowth and branching morphogenesis to form the stereotypic bronchial tree. Localised expression of *Fgf10* in the distal mesenchyme adjacent to the sites of lung bud formation has long been thought to drive branching morphogenesis in the lung but now, on p. 3731, Stijn De Langhe and colleagues challenge this model. They show that lung agenesis in *Fgf10* knockout mice can be rescued by ubiquitous overexpression of *Fgf10*, demonstrating that localised *Fgf10* expression is not required for lung branching morphogenesis *in vivo*. Instead, they report, localised *Fgf10* prevents the differentiation of distal epithelial progenitors into Sox2-expressing airway epithelial cells, thus suggesting that *Fgf10* plays a role in proximal-distal patterning. Furthermore, they show that, later in development, *Fgf10* can promote the differentiation of airway epithelial cells to basal cells, a finding that has important implications for understanding and improving lung injury and repair.

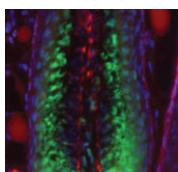

### Stem cell quiescence outFoxed

Hair follicles cyclically degenerate and regenerate through adult life: after an initial growth phase, hair follicles enter a destructive phase and then go through a quiescent stage before re-entering the next growth phase. This cycling involves hair follicle stem cells (HFSCs) but how these cells transition between the phases of the hair follicle cycle is unclear. Here, Hoang Nguyen and colleagues report that the forkhead transcription factor *Foxp1* is crucial for maintaining HFSC quiescence (p. 3809). The authors show that *Foxp1* is expressed in adult mouse HFSCs and that ablation of *Foxp1* in skin epithelial cells shortens the quiescent phase of the hair cycle and causes precocious HFSC activation. Furthermore, they report that overexpression of *Foxp1* in keratinocytes leads to cell cycle arrest as well as to upregulation of *Fgf18*, which has been previously implicated in controlling HFSC quiescence. Finally, the researchers demonstrate that exogenously delivered FGF18 can prevent the HFSCs of *Foxp1*-null mice from being prematurely activated, confirming that FGF18 acts downstream of *Foxp1* to regulate stem cell quiescence.

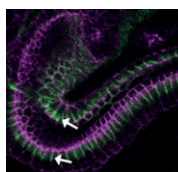

### Fasci(cli)nating link between signal transduction and morphogenesis

The molecular mechanisms that link intracellular signalling pathways to changes in tissue morphology are unclear. Using the *Drosophila* embryonic hindgut as a model, Martin Zeidler and co-workers demonstrate that the transmembrane protein Fasciclin III (FasIII) regulates intracellular adhesion and links signal transduction to morphogenesis (p. 3858). The researchers show that normal hindgut curvature is dependent on JAK/STAT signalling, and that JAK/STAT pathway activity asymmetrically localises to the inside curve of the developing hindgut, where it drives FasIII lateralisation. In addition, they demonstrate that FasIII promotes intracellular adhesion both *in vivo* and in cells *in vitro*. Based on these findings and the differential interfacial tension hypothesis, the researchers establish a mathematical model of the developing hindgut, which suggests that intracellular adhesion mediated by FasIII is sufficient to explain the curvature observed in the hindgut. These findings, together with additional studies of tissue folding in the *Drosophila* wing disc, suggest that FasIII-dependent modulation of intracellular adhesion might be a general mechanism by which organs are shaped during development.

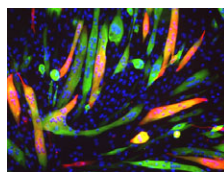

### Dlk1 muscles out of regeneration

Muscle development is driven by a set of myogenic factors, but how these are regulated during normal development and during regeneration is unclear. Here (p. 3743), Charlotte Harken Jensen and colleagues show that *delta-like 1 homolog (Dlk1)*, an imprinted gene, is a crucial regulator of the myogenic program in mice. They report that *Dlk1*-null mice exhibit impaired muscle development due to a defective myogenic transcriptional program: the myogenic genes *Mef2c*, *Meis1* and *Myod1* are suppressed in these mice. Surprisingly, however, they find that depletion of *Dlk1*, which is known to be re-expressed in regenerating muscle, in fact enhances muscle regeneration both *in vitro* and *in vivo*. This improved regenerative capacity in the absence of *Dlk1* is associated with an enhanced myogenic program, and is not due to altered adipogenic-myogenic commitment. Together, these findings highlight a dual function for *Dlk1* – as an enhancer of muscle development but as an inhibitor of muscle regeneration – and may open up new possibilities for improving muscle regeneration in human disease.

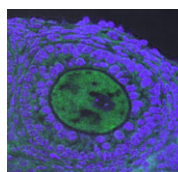

### A new cloud on the horizon of mouse oocytes

The piRNA pathway silences retrotransposons and hence maintains genome integrity in the germline. Several components of the piRNA pathway localise to a structure called the nuage, which has been detected in many animal germlines, including mouse testes and *Drosophila* oocytes. Now, Ai Khim Lim, Barbara Knowles and colleagues show that a nuage-like structure can be found in mouse oocytes (p. 3819). They report that the nuage proteins mouse vasa homologue (MVH), Piwi-like 2 (PIWIL2/MILI) and tudor domain-containing 9 (TDRD9) transiently colocalise to a nuage-like structure in mouse oocytes shortly after birth. Furthermore, they report, the nuage protein GASZ, which is functionally but not structurally linked to the nuage in testes, is also present in cytoplasmic granules in oocytes. Using mutant mice, the authors demonstrate that the nuage genes *Mvh*, *Mili* and *Gasz* control retrotransposon repression through the piRNA pathway. Importantly, however, they find that these null-mutant females, unlike their male counterparts, are fertile, thus highlighting that retrotransposon activation and sterility are uncoupled in female mice.

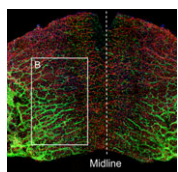

### A novel role for TGFβ in lymphangiogenesis

Lymphangiogenesis, the formation of lymphatic vessels, involves multiple growth factors and receptors, including vascular endothelial growth factor C (VEGFC) and its receptor VEGFR3. Here, on p. 3903, Yoh-suke Mukoyama and co-workers uncover a role for TGFβ signalling during lymphatic network development in mice. The researchers first develop a novel, whole-mount imaging technique to visualise lymphatic vessels in the anterior dorsal skin of mouse embryos. Using this approach, combined with conditional knockout of TGFβ receptors (*Tgfb1* or *Tgfb2*) in lymphatic endothelial cells (LECs), they show that a loss of TGFβ signalling in LECs leads to reduced vessel sprouting and hence a global decrease in lymphatic network complexity. Furthermore, they report, LEC proliferation is increased following TGFβ receptor depletion. Finally, they demonstrate that TGFβ signalling in a dermal lymphatic cell line can upregulate the expression of VEGFR3 and the VEGFC co-receptor neuropilin 2. These studies, together with other findings, suggest that TGFβ plays a dual role during lymphangiogenesis, both enhancing LEC sprouting while decreasing LEC proliferation.
